# Supplementary figures and images for: Vaccine Hesitancy Phenomenon Evolution during Pregnancy over High-Risk Epidemiological Periods—“Repetitio Est Mater Studiorum”
Source: MDPI journal article supplement (doi:10.3390/vaccines11071207), 2023-07-05

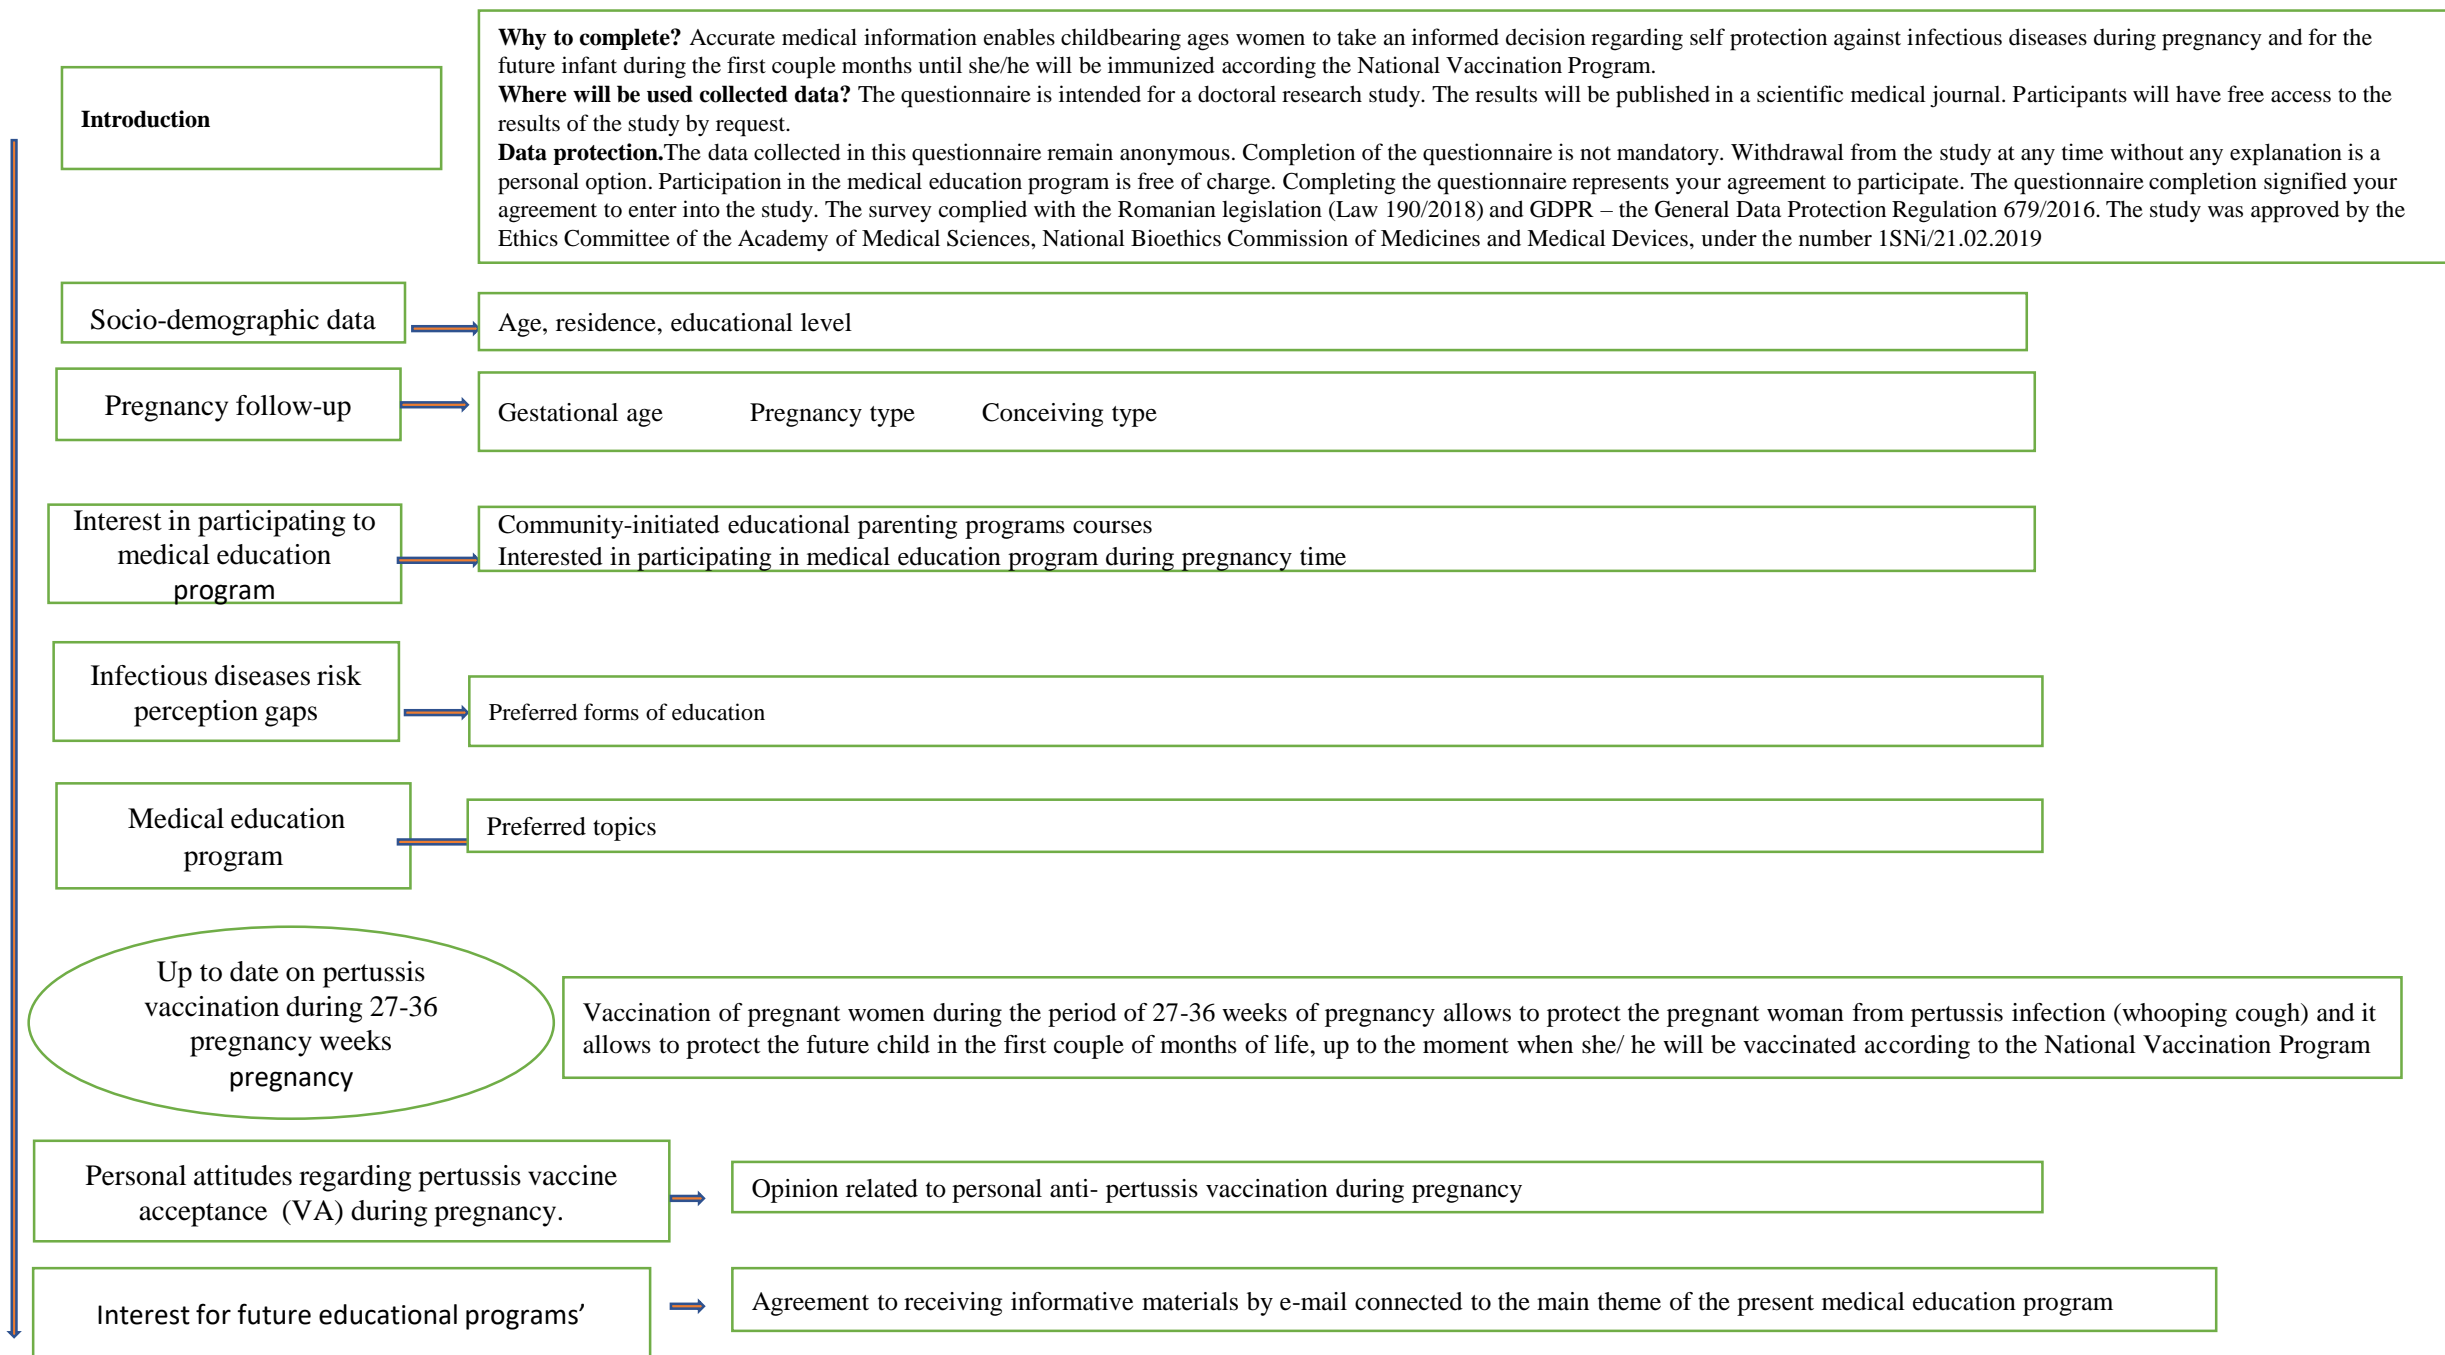

Supplement: s1 [file s1]
